# Supplementary material for: CCL19 has potential to be a potential prognostic biomarker and a modulator of tumor immune microenvironment (TIME) of breast cancer: a comprehensive analysis based on TCGA database
Source: publisher site journal article supplement (doi:10.18632/aging.204081), 2022-05-12
Supplement: Supplementary file [file aging-v14i9-204081-supplementary-material-SD1.pdf]

**SUPPLEMENTARY FIGURE**

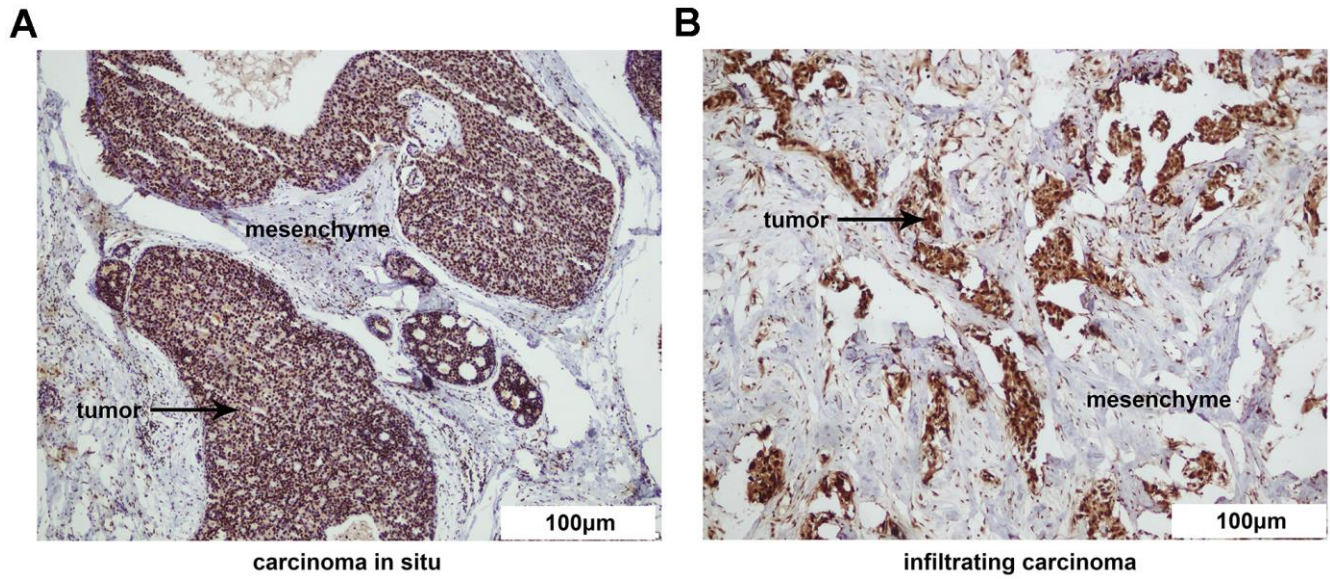

**Supplementary Figure 1. The expression of CCL19 in breast cancer tissues.** (A) The expression of CCL19 in carcinoma in situ of breast cancer. (B) The expression of CCL19 in carcinoma in infiltrating breast carcinoma.
